# Supplementary material
Source: PubMed Central journal article supplement (PMC7311251)
Supplement: NIHMS1568039-supplement-2.pdf [file NIHMS1568039-supplement-2.pdf]

Below is a descriptive analysis of covariates included in the propensity score models. For each analysis performed (1: probability of FUBC versus no FUBC; 2: probability of positive FUBC versus negative FUBC) we included both the unweighted and weighted (by the propensity score) analyses. In blue we have highlighted p-values that were significant ( $p < 0.05$ ). No covariates were statistically different between the two comparison groups after weighting by the propensity score.

## 1. Propensity score model comparing patients with FUBC versus no FUBC

### Unweighted

| Variable                 | Variable Value     | FUBC No (Col %) | FUBC Yes (Col %) | Chi-Sq p-value |
|--------------------------|--------------------|-----------------|------------------|----------------|
| race_black               | 0                  | 397 ( 32.9)     | 809 ( 67.1)      | 0.07015        |
| race_black               | 1                  | 141 ( 28.4)     | 355 ( 71.6)      | .              |
| Female                   | No                 | 304 ( 32.5)     | 632 ( 67.5)      | 0.39415        |
| Female                   | Yes                | 234 ( 30.5)     | 532 ( 69.5)      | .              |
| hemodialysis dependent   | No                 | 501 ( 32.7)     | 1029 ( 67.3)     | 0.00266        |
| hemodialysis dependent   | Yes                | 37 ( 21.5)      | 135 ( 78.5)      | .              |
| diabetic                 | No                 | 364 ( 32.5)     | 756 ( 67.5)      | 0.27323        |
| diabetic                 | Yes                | 174 ( 29.9)     | 408 ( 70.1)      | .              |
| corticosteroid use?      | No                 | 432 ( 33.5)     | 859 ( 66.5)      | 0.00358        |
| corticosteroid use?      | Yes                | 106 ( 25.8)     | 305 ( 74.2)      | .              |
| transplant recipient?    | No                 | 494 ( 33.6)     | 976 ( 66.4)      | 0.00001        |
| transplant recipient?    | Yes                | 44 ( 19)        | 188 ( 81)        | .              |
| Neoplasm?                | No                 | 304 ( 29.3)     | 734 ( 70.7)      | 0.00997        |
| Neoplasm?                | Yes                | 234 ( 35.2)     | 430 ( 64.8)      | .              |
| Fever when BCx drawn     | No                 | 158 ( 26.7)     | 434 ( 73.3)      | 0.00068        |
| Fever when BCx drawn     | Yes                | 364 ( 34.8)     | 681 ( 65.2)      | .              |
| central IV cath present? | No                 | 448 ( 32.6)     | 927 ( 67.4)      | 0.07699        |
| central IV cath present? | Yes                | 90 ( 27.5)      | 237 ( 72.5)      | .              |
| route                    | Community acquired | 389 ( 32.9)     | 795 ( 67.1)      | 0.09493        |
| route                    | Hospital acquired  | 149 ( 28.8)     | 369 ( 71.2)      | .              |
| Cardiac device present   | No                 | 508 ( 32.5)     | 1055 ( 67.5)     | 0.00797        |
| Cardiac device present   | Yes                | 30 ( 21.6)      | 109 ( 78.4)      | .              |
| Source_skin_soft_tissue  | 0                  | 509 ( 31.8)     | 1094 ( 68.2)     | 0.60942        |
| Source_skin_soft_tissue  | 1                  | 29 ( 29.3)      | 70 ( 70.7)       | .              |
| Source_endovascular      | 0                  | 503 ( 33.9)     | 979 ( 66.1)      | 0.00000        |
| Source_endovascular      | 1                  | 35 ( 15.9)      | 185 ( 84.1)      | .              |
| Source_GI                | 0                  | 455 ( 31.3)     | 1000 ( 68.7)     | 0.46616        |
| Source_GI                | 1                  | 83 ( 33.6)      | 164 ( 66.4)      | .              |
| Source_GU                | 0                  | 337 ( 29.3)     | 814 ( 70.7)      | 0.00280        |
| Source_GU                | 1                  | 201 ( 36.5)     | 350 ( 63.5)      | .              |
| Source_respiratory       | 0                  | 510 ( 32.3)     | 1068 ( 67.7)     | 0.02471        |
| Source_respiratory       | 1                  | 28 ( 22.6)      | 96 ( 77.4)       | .              |
| Source_other             | 0                  | 510 ( 32.1)     | 1077 ( 67.9)     | 0.08282        |
| Source_other             | 1                  | 28 ( 24.3)      | 87 ( 75.7)       | .              |

## Weighted

| Variable                 | Variable Value     | FUBC No (Col %)      | FUBC Yes (Col %)     | Chi-Sq p-value |
|--------------------------|--------------------|----------------------|----------------------|----------------|
| race_black               | 0                  | 1141.6420329 ( 49.8) | 1151.0781046 ( 50.2) | 0.88844        |
| race_black               | 1                  | 473.0654835 ( 50.1)  | 471.83015086 ( 49.9) | .              |
| Female                   | No                 | 877.05968766 ( 49.7) | 888.84070384 ( 50.3) | 0.79645        |
| Female                   | Yes                | 737.64782878 ( 50.1) | 734.06755162 ( 49.9) | .              |
| hemodialysis dependent   | No                 | 1465.9065602 ( 50.1) | 1461.7022772 ( 49.9) | 0.48767        |
| hemodialysis dependent   | Yes                | 148.80095625 ( 48)   | 161.20597827 ( 52)   | .              |
| diabetic                 | No                 | 1055.1987799 ( 49.7) | 1068.0707317 ( 50.3) | 0.78162        |
| diabetic                 | Yes                | 559.50873656 ( 50.2) | 554.83752372 ( 49.8) | .              |
| corticosteroid use?      | No                 | 1238.1658509 ( 50.1) | 1234.1420345 ( 49.9) | 0.67048        |
| corticosteroid use?      | Yes                | 376.54166556 ( 49.2) | 388.76622099 ( 50.8) | .              |
| transplant recipient?    | No                 | 1413.5593392 ( 50.1) | 1407.1197203 ( 49.9) | 0.47600        |
| transplant recipient?    | Yes                | 201.1481772 ( 48.2)  | 215.78853519 ( 51.8) | .              |
| Neoplasm?                | No                 | 983.00377922 ( 50.1) | 978.7806024 ( 49.9)  | 0.74094        |
| Neoplasm?                | Yes                | 631.70373721 ( 49.5) | 644.12765306 ( 50.5) | .              |
| Fever when BCx drawn     | No                 | 580.22016044 ( 49.8) | 584.01850074 ( 50.2) | 0.97518        |
| Fever when BCx drawn     | Yes                | 1034.487356 ( 49.9)  | 1038.8897547 ( 50.1) | .              |
| central IV cath present? | No                 | 1301.781978 ( 49.7)  | 1315.929888 ( 50.3)  | 0.73704        |
| central IV cath present? | Yes                | 312.92553841 ( 50.5) | 306.9783675 ( 49.5)  | .              |
| route                    | Community acquired | 1128.3212694 ( 49.8) | 1139.5156404 ( 50.2) | 0.83436        |
| route                    | Hospital acquired  | 486.38624703 ( 50.2) | 483.3926151 ( 49.8)  | .              |
| Cardiac device present   | No                 | 1477.835936 ( 49.8)  | 1489.1784822 ( 50.2) | 0.80798        |
| Cardiac device present   | Yes                | 136.87158044 ( 50.6) | 133.72977331 ( 49.4) | .              |
| Source_skin_soft_tissue  | 0                  | 1520.8346041 ( 49.9) | 1528.2726726 ( 50.1) | 0.98292        |
| Source_skin_soft_tissue  | 1                  | 93.872912348 ( 49.8) | 94.635582867 ( 50.2) | .              |
| Source_endovascular      | 0                  | 1424.8892798 ( 50.1) | 1419.4923771 ( 49.9) | 0.49778        |
| Source_endovascular      | 1                  | 189.81823664 ( 48.3) | 203.41587836 ( 51.7) | .              |
| Source_GI                | 0                  | 1372.7913934 ( 49.8) | 1384.2923393 ( 50.2) | 0.82329        |
| Source_GI                | 1                  | 241.91612304 ( 50.3) | 238.6159162 ( 49.7)  | .              |
| Source_GU                | 0                  | 1065.3787573 ( 49.6) | 1081.9253462 ( 50.4) | 0.67956        |
| Source_GU                | 1                  | 549.32875917 ( 50.4) | 540.98290926 ( 49.6) | .              |
| Source_respiratory       | 0                  | 1508.2806459 ( 50)   | 1505.9851594 ( 50)   | 0.49104        |
| Source_respiratory       | 1                  | 106.42687056 ( 47.7) | 116.92309601 ( 52.3) | .              |
| Source_other             | 0                  | 1502.1273428 ( 49.8) | 1512.6646898 ( 50.2) | 0.84039        |
| Source_other             | 1                  | 112.58017359 ( 50.5) | 110.24356564 ( 49.5) | .              |

## 2. Propensity score model comparing patients with positive FUBC versus negative FUBC

### Unweighted

| Variable                 | Variable Value     | FUBC Same Org No (Col %) | FUBC Same Org Yes (Col %) | Chi-Sq p-value |
|--------------------------|--------------------|--------------------------|---------------------------|----------------|
| race_black               | 0                  | 615 ( 79.5)              | 159 ( 20.5)               | 0.94278        |
| race_black               | 1                  | 270 ( 79.6)              | 69 ( 20.4)                | .              |
| Female                   | No                 | 486 ( 79.7)              | 124 ( 20.3)               | 0.88614        |
| Female                   | Yes                | 399 ( 79.3)              | 104 ( 20.7)               | .              |
| hemodialysis dependent   | No                 | 791 ( 80.5)              | 191 ( 19.5)               | <b>0.01915</b> |
| hemodialysis dependent   | Yes                | 94 ( 71.8)               | 37 ( 28.2)                | .              |
| diabetic                 | No                 | 567 ( 78.9)              | 152 ( 21.1)               | 0.46433        |
| diabetic                 | Yes                | 318 ( 80.7)              | 76 ( 19.3)                | .              |
| corticosteroid use?      | No                 | 664 ( 80.8)              | 158 ( 19.2)               | 0.07913        |
| corticosteroid use?      | Yes                | 221 ( 75.9)              | 70 ( 24.1)                | .              |
| transplant recipient?    | No                 | 748 ( 80.3)              | 184 ( 19.7)               | 0.16359        |
| transplant recipient?    | Yes                | 137 ( 75.7)              | 44 ( 24.3)                | .              |
| Neoplasm?                | No                 | 558 ( 78.9)              | 149 ( 21.1)               | 0.52000        |
| Neoplasm?                | Yes                | 327 ( 80.5)              | 79 ( 19.5)                | .              |
| Fever when BCx drawn     | No                 | 328 ( 79.2)              | 86 ( 20.8)                | 0.49149        |
| Fever when BCx drawn     | Yes                | 531 ( 80.9)              | 125 ( 19.1)               | .              |
| central IV cath present? | No                 | 720 ( 80.4)              | 175 ( 19.6)               | 0.11848        |
| central IV cath present? | Yes                | 165 ( 75.7)              | 53 ( 24.3)                | .              |
| route                    | Community acquired | 619 ( 80.8)              | 147 ( 19.2)               | 0.11185        |
| route                    | Hospital acquired  | 266 ( 76.7)              | 81 ( 23.3)                | .              |
| Cardiac device present   | No                 | 809 ( 80.3)              | 198 ( 19.7)               | <b>0.03605</b> |
| Cardiac device present   | Yes                | 76 ( 71.7)               | 30 ( 28.3)                | .              |
| Source_skin_soft_tissue  | 0                  | 826 ( 79.1)              | 218 ( 20.9)               | 0.20286        |
| Source_skin_soft_tissue  | 1                  | 59 ( 85.5)               | 10 ( 14.5)                | .              |
| Source_endovascular      | 0                  | 765 ( 81.7)              | 171 ( 18.3)               | <b>0.00003</b> |
| Source_endovascular      | 1                  | 120 ( 67.8)              | 57 ( 32.2)                | .              |
| Source_GI                | 0                  | 762 ( 79.4)              | 198 ( 20.6)               | 0.77218        |
| Source_GI                | 1                  | 123 ( 80.4)              | 30 ( 19.6)                | .              |
| Source_GU                | 0                  | 604 ( 78.1)              | 169 ( 21.9)               | 0.08595        |
| Source_GU                | 1                  | 281 ( 82.6)              | 59 ( 17.4)                | .              |
| Source_respiratory       | 0                  | 807 ( 79)                | 214 ( 21)                 | 0.19117        |
| Source_respiratory       | 1                  | 78 ( 84.8)               | 14 ( 15.2)                | .              |
| Source_other             | 0                  | 829 ( 80.3)              | 204 ( 19.7)               | <b>0.02861</b> |
| Source_other             | 1                  | 56 ( 70)                 | 24 ( 30)                  | .              |

## Weighted

| Variable                 | Variable Value     | FUBC Same Org No (Col %) | FUBC Same Org Yes (Col %) | Chi-Sq p-value |
|--------------------------|--------------------|--------------------------|---------------------------|----------------|
| race_black               | 0                  | 740.30904415 ( 50.5)     | 725.09771125 ( 49.5)      | 0.32641        |
| race_black               | 1                  | 322.67917387 ( 48.2)     | 346.36953925 ( 51.8)      | .              |
| Female                   | No                 | 577.26757928 ( 49.7)     | 584.88724407 ( 50.3)      | 0.89615        |
| Female                   | Yes                | 485.72063874 ( 50)       | 486.58000643 ( 50)        | .              |
| hemodialysis dependent   | No                 | 939.97730074 ( 49.6)     | 953.67645694 ( 50.4)      | 0.67259        |
| hemodialysis dependent   | Yes                | 123.01091728 ( 51.1)     | 117.79079357 ( 48.9)      | .              |
| diabetic                 | No                 | 687.64806849 ( 51.1)     | 657.33757384 ( 48.9)      | 0.10992        |
| diabetic                 | Yes                | 375.34014953 ( 47.5)     | 414.12967667 ( 52.5)      | .              |
| corticosteroid use?      | No                 | 788.12096846 ( 49.5)     | 804.81321317 ( 50.5)      | 0.60616        |
| corticosteroid use?      | Yes                | 274.86724956 ( 50.8)     | 266.65403733 ( 49.2)      | .              |
| transplant recipient?    | No                 | 895.28538567 ( 49.7)     | 905.59924261 ( 50.3)      | 0.85060        |
| transplant recipient?    | Yes                | 167.70283236 ( 50.3)     | 165.8680079 ( 49.7)       | .              |
| Neoplasm?                | No                 | 668.51016561 ( 50.7)     | 650.54443497 ( 49.3)      | 0.30124        |
| Neoplasm?                | Yes                | 394.47805241 ( 48.4)     | 420.92281553 ( 51.6)      | .              |
| Fever when BCx drawn     | No                 | 412.59488493 ( 50.2)     | 409.12733677 ( 49.8)      | 0.76459        |
| Fever when BCx drawn     | Yes                | 650.39333309 ( 49.5)     | 662.33991374 ( 50.5)      | .              |
| central IV cath present? | No                 | 860.24735725 ( 49.7)     | 870.64923016 ( 50.3)      | 0.84546        |
| central IV cath present? | Yes                | 202.74086078 ( 50.2)     | 200.81802035 ( 49.8)      | .              |
| route                    | Community acquired | 735.44594852 ( 49.4)     | 754.45854532 ( 50.6)      | 0.53702        |
| route                    | Hospital acquired  | 327.54226951 ( 50.8)     | 317.00870518 ( 49.2)      | .              |
| Cardiac device present   | No                 | 960.954222 ( 49.8)       | 969.90872792 ( 50.2)      | 0.92461        |
| Cardiac device present   | Yes                | 102.03399602 ( 50.1)     | 101.55852259 ( 49.9)      | .              |
| Source_skin_soft_tissue  | 0                  | 997.33544009 ( 49.7)     | 1010.4085548 ( 50.3)      | 0.64056        |
| Source_skin_soft_tissue  | 1                  | 65.652777931 ( 51.8)     | 61.058695721 ( 48.2)      | .              |
| Source_endovascular      | 0                  | 896.25498167 ( 49.7)     | 906.03996667 ( 50.3)      | 0.87543        |
| Source_endovascular      | 1                  | 166.73323636 ( 50.2)     | 165.42728384 ( 49.8)      | .              |
| Source_GI                | 0                  | 915.97756119 ( 49.7)     | 927.62374101 ( 50.3)      | 0.78507        |
| Source_GI                | 1                  | 147.01065683 ( 50.5)     | 143.8435095 ( 49.5)       | .              |
| Source_GU                | 0                  | 731.54978136 ( 50)       | 730.37509647 ( 50)        | 0.74494        |
| Source_GU                | 1                  | 331.43843667 ( 49.3)     | 341.09215404 ( 50.7)      | .              |
| Source_respiratory       | 0                  | 977.04871164 ( 49.8)     | 986.76658913 ( 50.2)      | 0.87842        |
| Source_respiratory       | 1                  | 85.939506389 ( 50.4)     | 84.700661374 ( 49.6)      | .              |
| Source_other             | 0                  | 987.86484244 ( 49.8)     | 993.9468396 ( 50.2)       | 0.88044        |
| Source_other             | 1                  | 75.123375584 ( 49.2)     | 77.520410904 ( 50.8)      | .              |
